# Supplementary material for: Timing matters: the overlooked issue of response time mismatch in pH-dependent analyte sensing using multiple sensors
Source: Royal Society of Chemistry journal article supplement (doi:10.1039/d3an01207g), 2023-01-01
Supplement: d3an01207g1.pdf [file d3an01207g1.pdf]

**Supporting Information for:**

**Timing Matters: The Overlooked Issue of Response Time Mismatch in pH-Dependent Analyte Sensing using Multiple Sensors**

Fabian Steininger<sup>1</sup>, Silvia E. Zieger<sup>1,2\*</sup> and Klaus Koren<sup>1\*</sup>

<sup>1</sup>Aarhus University Centre for Water Technology, Department of Biology, Section for Microbiology, Aarhus University, Aarhus, Denmark

<sup>2</sup>Data Scientist and Environmental Consultant – SilviaZieger SP, Otte Ruds Gade 44A, 8200 Aarhus N, Denmark

Corresponding Author\*: info@silviazieger.com, klauskoren@bio.au.dk

**Table of Contents:**

|                                                                                                                          |     |
|--------------------------------------------------------------------------------------------------------------------------|-----|
| 1. Response Time of Commercial Sensors .....                                                                             | S-2 |
| <b>Table S1.</b> Response times of pH, NH <sub>4</sub> <sup>+</sup> , NH <sub>3</sub> and H <sub>2</sub> S sensors ..... | S-2 |
| 2. Additional Experimental Results .....                                                                                 | S-3 |
| <b>Figure S1.</b> Calculated TDS – pH shift interval = 30 s .....                                                        | S-3 |
| <b>Figure S2.</b> Bulk electrode, micro electrode and optode .....                                                       | S-4 |
| <b>Figure S3.</b> Simulation: slow pH sensor vs. slow H <sub>2</sub> S sensor .....                                      | S-4 |
| 3. References .....                                                                                                      | S-5 |

## 1. RESPONSE TIME OF COMMERCIAL SENSORS

**Table S1.** Response times of commercially available optical and electrochemical sensors for pH, NH<sub>4</sub><sup>+</sup>, NH<sub>3</sub> and H<sub>2</sub>S.

| Analyte                      | Type              | Response time /s | Supplier                  |
|------------------------------|-------------------|------------------|---------------------------|
| pH                           | Optical           | <60              | Pyroscience <sup>1</sup>  |
|                              | Optical           | <120             | Presens <sup>2</sup>      |
|                              | Potentiometric    | 1-60             | Krohne <sup>3</sup>       |
|                              | Potentiometric    | <10              | Unisense <sup>4</sup>     |
|                              | Potentiometric    | <45              | MetrOhm <sup>5</sup>      |
| NH <sub>4</sub> <sup>+</sup> | ISE               | <180             | Hach <sup>6</sup>         |
| NH <sub>3</sub>              | Severinghaus-type | <60              | Fisher <sup>7</sup>       |
|                              | Severinghaus-type | <600             | MetrOhm <sup>8</sup>      |
| H <sub>2</sub> S             | Amperometric      | <10              | Unisense <sup>9</sup>     |
|                              | Amperometric      | <25              | Sulfilogger <sup>10</sup> |

## 2. ADDITIONAL EXPERIMENTAL RESULTS

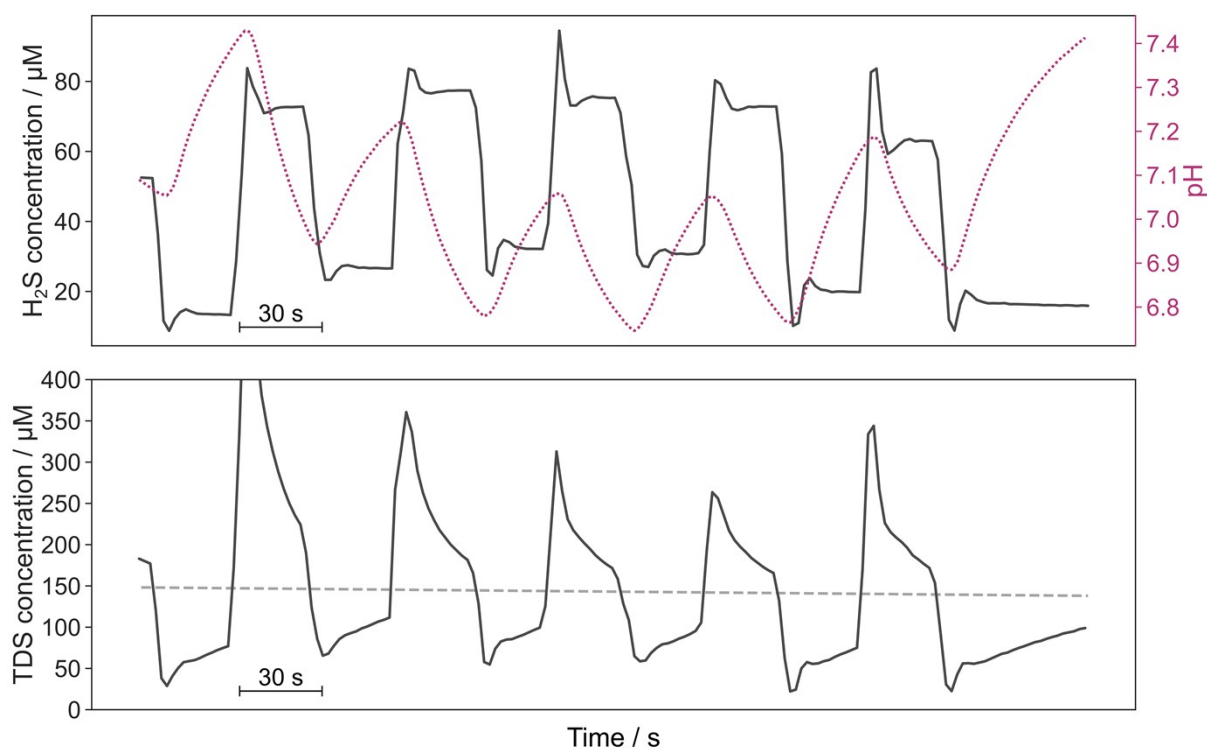

**Figure S1.** Calculation of TDS from measured H<sub>2</sub>S and pH at fixed TDS concentration while varying the sample pH in the range of 6-8. H<sub>2</sub>S was measured using a fast amperometric microsensor ( $t_{90} < 10$  s) while pH was simultaneously measured with an optical sensor ( $t_{90} < 60$  s). The sample pH was modified by additions of defined amounts of HCl or NaOH in time intervals of 30 s.

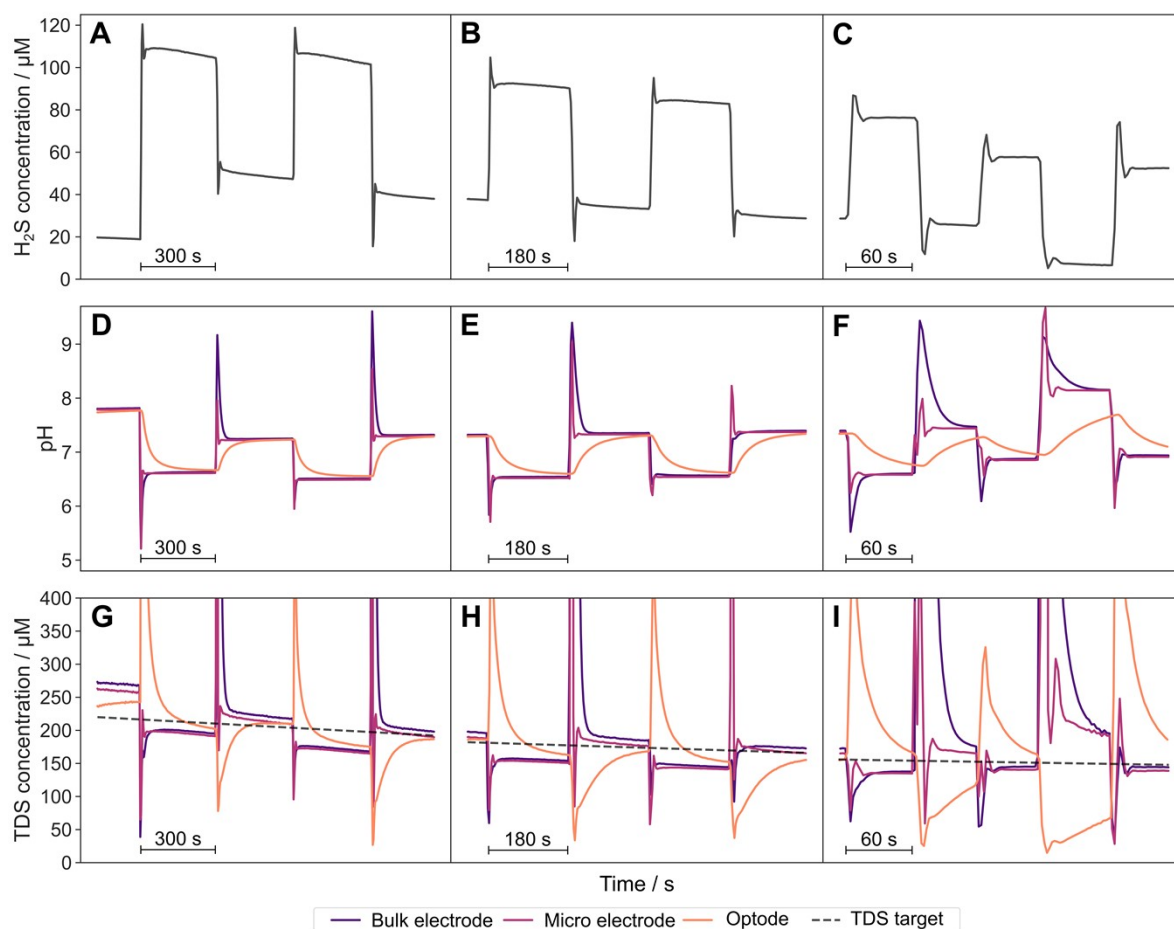

**Figure S2.** Calculation of TDS from measured  $\text{H}_2\text{S}$  and pH at fixed TDS concentration while varying the sample pH in the range of 6-8.  $\text{H}_2\text{S}$  was measured using a fast amperometric microsensor ( $t_{90} < 10$  s) while pH was simultaneously measured with three different methods: bulk electrode, micro electrode and optode (response time: micro electrode  $<$  bulk electrode  $<$  optode). The sample pH was modified by additions of defined amounts of HCl or NaOH in time intervals of 5 min (**A, D, G**), 3 min (**B, E, H**) and 1 min (**C, F, I**).

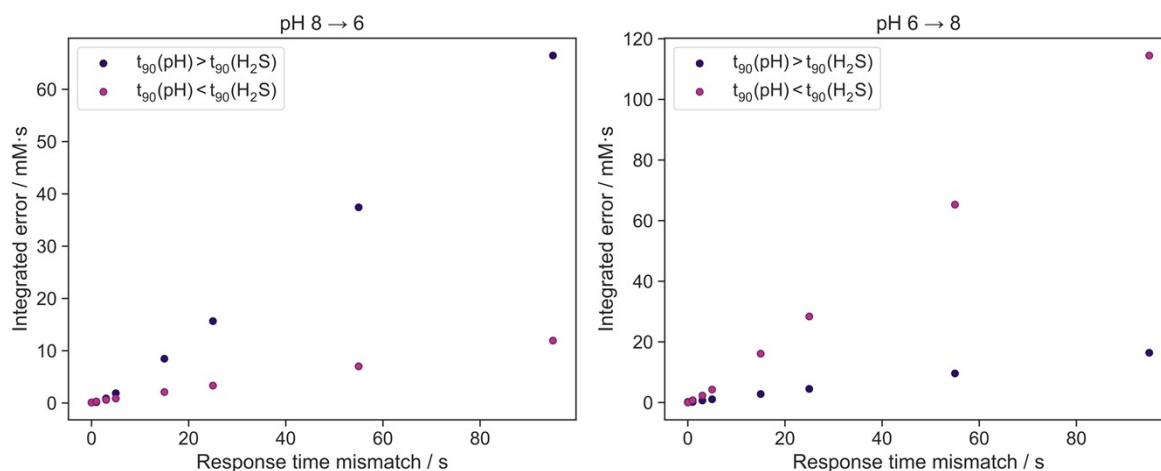

**Figure S3.** Integrated error at different response time mismatches, varying either the response time of the pH or  $\text{H}_2\text{S}$  sensor. Results are shown for a decrease (**left**) and an increase of 2 pH units (**right**). Target TDS concentration = 200  $\mu\text{M}$ ;  $\text{pK}_a = 7$ .

### 3. REFERENCES

- 1 PyroScience GmbH | pH, <https://www.pyroscience.com/en/products/ph>, (accessed 21 June 2023).
- 2 Presens | Optical pH Sensors, <https://www.presens.de/products/ph/sensors>, (accessed 21 June 2023).
- 3 Krohne Group | pH sensors and measuring systems, <https://krohne.com/en/products/process-analytics/analytical-sensors-measuring-systems/ph-sensors-measuring-systems>, (accessed 21 June 2023).
- 4 Unisense | pH microelectrode for research applications, <https://unisense.com/products/ph-microelectrode/>, (accessed 21 June 2023).
- 5 Metrohm | 780/781 pH/ion meters, [https://www.metrohm.com/en\\_us/products/ph-ion-measurement/Laboratory-ion-pH-meters.html](https://www.metrohm.com/en_us/products/ph-ion-measurement/Laboratory-ion-pH-meters.html), (accessed 21 June 2023).
- 6 Hach | A-ISE sc Low cost ISE Ammonium probe (immersion) with RFID, <https://ie.hach.com/a-ise-sc-low-cost-ise-ammonium-probe-immersion-with-rfid-10-m-cable/product?id=26371051351>, (accessed 21 June 2023).
- 7 Thermo Scientific | Orion High-Performance Ammonia Electrode, <https://www.fishersci.com/shop/products/orion-high-performance-ammonia-electrode/13643500>, (accessed 21 June 2023).
- 8 NH<sub>3</sub>-selective gas membrane electrode (low conc.) | Metrohm, [https://www.metrohm.com/en\\_us/products/6/0506/60506100.html](https://www.metrohm.com/en_us/products/6/0506/60506100.html), (accessed 21 June 2023).
- 9 Unisense | H<sub>2</sub>S Microsensor for hydrogen sulfide research, [https://unisense.com/products/H<sub>2</sub>S-microsensor/](https://unisense.com/products/H2S-microsensor/), (accessed 21 June 2023).
- 10 SulfiLogger | H<sub>2</sub>S sensor, <https://sulfilogger.com/sulfilogger-sensor/>, (accessed 21 June 2023).
